1 Eating behavior trajectories in the first ten years of life and their relationship with BMI

2

3 Moritz Herle<sup>1</sup>, Bianca De Stavola<sup>1</sup>, Christopher Hübel<sup>2,3,4</sup>, Diana L Santos Ferreira<sup>5,6</sup>,

4 Mohamed Abdulkadir<sup>7</sup>, Zeynep Yilmaz<sup>8</sup>, Ruth Loos<sup>9</sup>, Rachel Bryant-Waugh<sup>1,10</sup>, Cynthia M.

5 Bulik<sup>4,8,11</sup> & Nadia Micali<sup>1,7,12</sup>

6 <sup>1</sup> Great Ormond Street Institute of Child Health, University College London, London, UK

7 <sup>2</sup> Social, Genetic & Developmental Psychiatry Centre, Institute of Psychiatry, Psychology &

8 Neuroscience, King's College London, UK

9 <sup>3</sup> UK National Institute for Health Research (NIHR) Biomedical Research Centre for Mental

10 Health, South London and Maudsley Hospital, London, UK

11 <sup>4</sup> Department of Medical Epidemiology and Biostatistics, Karolinska Institutet, Stockholm,

12 Sweden

13 <sup>5</sup> Medical Research Council Integrative Epidemiology, University of Bristol, Bristol, UK

14 <sup>6</sup> Population Health Sciences, Bristol Medical School, University of Bristol, Bristol, UK

15 <sup>7</sup> Department of Psychiatry, Faculty of Medicine, University of Geneva, Geneva, Switzerland

16 <sup>8</sup> Department of Psychiatry, University of North Carolina at Chapel Hill, Chapel Hill, NC,

17 USA

18 <sup>9</sup> Icahn Mount Sinai School of Medicine, New York, NY, USA

19 <sup>10</sup> Great Ormond Street Hospital, London, UK

20 <sup>11</sup> Department of Nutrition, University of North Carolina at Chapel Hill, Chapel Hill, NC,

21 USA

<sup>12</sup> Child and Adolescent Psychiatry Division, Department of Child and Adolescent Health,  
Geneva University Hospital, Geneva, Switzerland

Names for PubMed Index: Herle, De Stavola, Hübel, Santos Ferreira, Abdulkadir, Yilmaz,  
Loos, Bryant-Waugh, Bulik, Micali

Corresponding author:

Dr Nadia Micali MD, MRCPsych, PhD, FAED

Senior Lecturer and Honorary Consultant Psychiatrist  
Child and Adolescent Mental Health, Palliative Care and Paediatrics Section  
Population, Policy and Practice Research Theme  
UCL Institute of Child Health  
30 Guilford Street  
London WC1N 1EH  
Tel: 020 7905 2163  
Fax: 020 7831 7050  
e-mail: n.micali@ucl.ac.uk

Running title: Patterns of child eating behaviors and later BMI

Sources of support: This work was specifically funded by the UK Medical Research Council  
and the Medical Research Foundation (ref: MR/R004803/1).

Financial Disclosure: Bulik reports: Shire (grant recipient, Scientific Advisory Board  
member) and Pearson and Walker (author, royalty recipient).

Abbreviations: Eating behaviors: EB, Body Mass Index: BMI, Avon Longitudinal Study of  
Parents and Children: ALSPAC, Latent Class Growth Trajectories: LCGA,  
Avoidant/restrictive food intake disorder: ARFID

## 49 Abstract

50 **Background:** Child eating behaviors (EBs) are highly heterogeneous and their longitudinal  
51 impact on childhood weight is unclear. The objective of this study was to characterize EBs  
52 during the first ten years of life and evaluate associations with BMI at age 11 years.

53 **Method:** Data were parental reports of EBs from birth to age 10 years and standardized body  
54 mass index (zBMI) at age 11 years (n=12,048) from the Avon Longitudinal Study of Parents  
55 and Children. Latent class growth analysis was used to derive latent classes of over-, under-,  
56 and fussy eating. Linear regression models for zBMI at 11 years on each set of classes were  
57 fitted to assess associations with EBs trajectories.

58 **Results:** We identified four classes of overeating; low stable (70%), low transient (15%), late  
59 increasing (11%), and early increasing (6%). The early increasing class was associated with  
60 higher zBMI (boys:  $\beta=0.83$ , 95%CI:0.65, 1.02; girls:  $\beta=1.1$ ; 0.92, 1.28) compared to low  
61 stable. Six classes were found for undereating; low stable (25%), low transient (37%), low  
62 decreasing (21%), high transient (11%), high decreasing (4%), and high stable (2%). The  
63 latter was associated with lower zBMI (boys:  $\beta=-0.79$ ; -1.15, -0.42; girls:  $\beta=-0.76$ ; -1.06, -  
64 0.45). Six classes were found for fussy eating; low stable (23%), low transient (15%), low  
65 increasing (28%), high decreasing (14%), low increasing (13%), high stable (8%). The high  
66 stable class was associated with lower zBMI (boys:  $\beta=-0.49$ ; -0.68 -0.30; girls:  $\beta=-0.35$ ; -  
67 0.52, -0.18).

68 **Conclusions:** Early increasing overeating during childhood is associated with higher zBMI at  
69 age 11. High persistent levels of undereating and fussy eating are associated with lower  
70 zBMI. Longitudinal trajectories of EBs may help identify children potentially at risk of  
71 adverse weight outcomes.

72

## 73 Introduction

74 Child EBs have received attention, especially due to their potential association with weight.  
75 However, previous cross-sectional and a limited number of longitudinal studies produced  
76 inconsistent findings. Previous research has suggested that some EBs are stable across  
77 childhood, as indicated by moderate correlations between EBs at age 4 and 10.(1) However,  
78 some EBs, such as fussy eating, which is the tendency to eat only certain foods and to refuse  
79 to try new foods, are common and potentially more transient(2). One third of children show  
80 some fussiness during the first four years of life, but many tend to remit by age six with about  
81 4% being persistently fussy.(3)

82 Cross-sectional studies (4-6) have primarily suggested that EBs, such as responsiveness to  
83 external food cues or emotional overeating are associated with higher child weight. Other  
84 EBs, such as fussy eating and responsiveness to internal satiety cues are associated with  
85 lower weight (7-9). However, other cross-sectional studies have not replicated these findings  
86 (10, 11). Longitudinally, EBs measured at 5-6 years are weakly associated with body mass  
87 index (BMI) at about 6-8 years (12) . In earlier ages, between 3 months and 9-15 months, a  
88 bidirectional association between child eating and weight has been reported.(13) More  
89 recently, the bidirectional association between child eating and later BMI was replicated in a  
90 sample of Norwegian children, aged 4 to 8 years(14). Furthermore, children who display  
91 fussy eating appear to be at higher risk for developing underweight in childhood, but may be  
92 at increased risk for later overweight(15, 16) . However, some studies report no or only weak  
93 longitudinal relationships(17-19).

94 Overall, childhood EBs and childhood weight outcomes and the longitudinal development of  
95 child EBs remains poorly understood. Longitudinal studies often focus on overall mean  
96 scores, ignoring heterogeneity and transience of child EBs. We, therefore, aimed to

investigate repeatedly measured EBs in a large population-based birth cohort using latent class modeling to identify longitudinal trajectories during the first ten years of life. Furthermore, we examined their relationship with age- and sex-standardized zBMI at age 11. This age was selected as the outcome measures, due to the proximity to the derived trajectories and to ensure the largest and most representative sample of prepubertal children. Our hypothesis was that persistent EB patterns in childhood would be more strongly associated with child zBMI than transient ones.

## Methods

### Participants

Data from the Avon Longitudinal Study of Parents and Children (ALSPAC), a population based, longitudinal cohort of mothers and their children born in the southwest of England (20, 21) were analyzed. All pregnant women expected to have children between the 1<sup>st</sup> April 1991 and 31<sup>st</sup> December 1992 were invited to enroll in the study, providing informed written consent. From all pregnancies (n = 14,676), 14,451 mothers opted to take part; by one year 13,988 children were alive. When the oldest children were approximately 7 years of age, an attempt was made to bolster the initial sample with eligible cases who had failed to join the study originally (referred to as Phase 2), however these participants were not included in these analyses. The phases of enrolment are described in more detail in the cohort profile papers (20, 21). One sibling per set of multiple births, was randomly excluded from these analyses to guarantee independence of participants.

### *Eating behaviors*

Repeated measures of parent-reported child EBs were available at a maximum of eight time points around the age of 15, 24, 38, 54, 62, 81, 105, and 116 months. Parents were asked if they were worried about their child overeating (“How worried are you because your child is

overeating”), and undereating (“How worried are you because your child is undereating”). The remaining questions probed the child’s tendency to be fussy (“How worried are you because your child is choosy”, “How worried are you because your child has feeding difficulties”, “How worried are you because your child is refusing food”). Parents were given the following response options: “no/did not happen”, “not worried”, “a bit worried” and “greatly worry”. The two top categories (“a bit worried” and “greatly worry”) were combined to avoid very low frequencies.

### *Anthropometric data*

Weight and height were measured during clinic visits when the children (n = 4,885) were 11 years old (mean=128.6 months, SD=1.64). Height was measured to the nearest millimeter with the use of a Harpenden Stadiometer (Holtain Ltd.). Weight was measured with a Tanita Body Fat Analyzer (Tanita TBF UK Ltd.) to the nearest 50g. BMI was calculated by dividing weight (in kg) by height squared (in m). Age- and sex-standardized BMI z-scores (zBMI) were calculated according to UK reference data, indicating the degree to which a child is heavier (>0) or lighter (<0) than expected according to his/her age and sex(22).

### *Covariates*

The following indicators of socioeconomic status of the family were used: Maternal age at birth (years) and maternal education status (A-Levels or higher, lower than A-Levels) and parental occupational status (manual, non-manual labor of the highest earner in the family). Further birthweight (grams) and gestational age at birth (weeks) of the children were also used. In addition analysis of pre-pregnancy maternal BMI was also considered. The indicators of socioeconomic status were treated as potential confounders for the analyses of zBMI and as predictors of missing data for parent-reported EB data. Details of all data are

available through a fully searchable data dictionary at

[www.bristol.ac.uk/alspac/researchers/our-data](http://www.bristol.ac.uk/alspac/researchers/our-data).

## Statistical analyses

Analyses were conducted from October 2017 to May 2018 and included two stages in line with the classify-analyze framework (23).

First, Latent Class Growth Analysis (LCGA) was used to identify subgroups (“latent classes”) of children who share the same trajectories of EBs (24). In comparison to Growth Mixture Modelling, an alternative approach to identifying these latent classes, LCGA constrains the variation within each class to zero, reducing the number of parameters and simplifying model estimation (24). LCGA was conducted using Full Information Maximum Likelihood (FIML) (25), incorporating indicators of social class (maternal age, maternal education, and manual or non-manual labor of the highest earner in the family) as auxiliary variables to account for the missingness (including attrition) affecting the longitudinal data, as previously described in ALSPAC (20). FIML assumes data are missing at random (MAR), once these auxiliary variables are accounted for and therefore children with at least one measure of eating behavior at any time point. Analyses were stratified by sex to examine possible effect modification. Stratified results were compared against unstratified using combined data using Likelihood Ratio Tests. As the number of classes is not directly estimated, alternative specifications with increasing number of assumed classes were compared using the following model fit indicators: Akaike Information Criterion (AIC), Bayesian Information Criterion (BIC), adjusted Bayesian information Criterion (adj BIC), selecting the lowest values, and entropy, aiming for the highest. In addition to these model fit indicators, the class size and interpretability of the classes were taken into account as

recommended by Muthén (25). After selection of the best number of classes, estimations were repeated using 1000 random starts to avoid local maxima.

In the second stage, participants were allocated to their most likely classes according to their posterior probabilities using the maximum-probability assignment rule (26). These predicted classes were then included as explanatory variables in regression analyses of zBMI scores at age 11, which also controlled for the following a priori confounders: maternal age, gestational age, birthweight, and maternal education at birth. Results are reported in terms of adjusted regression coefficients ( $\beta$ ) for each class in comparison to the first (reference) class. Since not all children with EB data had data on zBMI, because of attrition affecting later ages, the characteristics of study participants with/without zBMI were compared in order to assess their representativeness of the original study membership. LCGA was conducted in MPlus Version 8 (27). Regression analyses were conducted in Stata 15 (28).

### *Ethical approval*

Ethical approval for the study was obtained from the ALSPAC Ethics and Law Committee and the Local Research Ethics Committees. All procedures were performed in accordance with the ethical standards laid down in the 1964 Declaration of Helsinki and its later amendments.



## Results

Summary statistics of the study population at baseline are listed in Table 1. Prevalence of the different EBs varied at the different time points (Figure 1). Overeating was uncommon, with the majority of parents reporting that their children never engaged in this behavior (77-85% across the 8 time points). Being choosy about food was the most common child behavior, especially at 54 months, when a fifth of the children were described as choosy to a worrying extent.

TABLE 1 here

FIGURE 1 here

### Eating behavior classes

Comparisons of alternative number of classes for the three LGCA models identified four classes for the overeating longitudinal data, and six classes for both undereating and fussy eating according to our pre-specified criteria (eTable 1a-c). Overall, separate models for boys and girls fit the data better than when analyzed jointly (eTable 2).

Most children were assigned to the “low stable” class of overeating, marked by the absence of high levels of overeating across time points (Figure 2). Undereating was more heterogeneous; the most common class was “low transient”, characterized by low levels of undereating, which attenuated completely by age 10. Similarly, the most common class for fussy eating was the “low transient” group, with increasing numbers of parents reporting fussy eating beginning at around 3 years. Figure 3a-c illustrates the class trajectories for overeating, undereating, and fussy eating.

When comparing maternal and gestational age at birth, birthweight, and maternal education across classes we found that, for overeating, boys and girls in the “early increasing” class had

a higher mean birthweight than those in the “low stable” class; eTable 3). Children in the “high stable” class of undereating and fussy eating had a lower mean birthweight than their respective “low stable” classes. In addition, the percentage of mothers with A-Levels or university degree was lower in the “low stable” class of fussy eating compared to the “high stable”. Child zBMI scores per eating behavior class ranged widely within all classes (eFigure 1a-b).

FIGURE 2 HERE

FIGURES 3A -3C HERE

### *Sensitivity analyses*

Not all children included in LCGA had zBMI data at 11 years. Class frequencies derived from all participants were compared to the frequencies among the children who had complete BMI data at 11 years. Class sizes and distributions were similar (eTable 5).

### **Association between EBs and zBMI at age 11**

#### *Overeating*

In comparison to children who were reported to never overeat (“low stable”), all other classes were positively associated with greater zBMI at the later age of 11 years: “low transient” (boys: coefficient  $\beta=0.26$ , 95%CI:0.13, 0.39; girls:  $\beta=0.32$ , 95%CI: 0.19, 0.44), “late increasing” (boys:  $\beta = 0.94$ , 95%CI: 0.8, 1.09; girls:  $\beta=0.94$ , 95%CI: 0.82, 1.07) and “early increasing” (boys:  $\beta=0.83$ , 95%CI: 0.65, 1.02; girls:  $\beta=1.1$ , 95%CI: 0.92, 1.28; Table 2).

#### *Undereating*

In contrast, undereating classes were associated with lower zBMI, in comparison to the “low stable” class. The magnitude of associations in the “high transient” (boys:  $\beta=-0.25$ , 95%CI:-0.41, -0.08; girls:  $\beta=-0.24$ , 95%CI:-0.38, -0.09) and “high decreasing” (boys:  $\beta=-0.27$ ,

95%CI:-0.5, -0.05; girls:  $\beta$ =-0.21, 95%CI:-0.45, 0.03) classes were similar. “Stable high” undereating was most strongly associated with lower zBMI (boys:  $\beta$ =-0.79, 95%CI:-1.15, -0.42; girls:  $\beta$ =-0.76, -1.06, -0.45; Table 2).

### *Fussy Eating*

Similarly, fussy eating was associated with lower zBMI, for both boys and girls. “Stable high” fussy eating was most strongly and negatively associated with zBMI (boys:  $\beta$ =-0.49, 95%CI: -0.68, -0.30; girls:  $\beta$ =-0.35, -0.52, -0.18; Table 2). In contrast to boys, amongst girls “low transient” and “low increasing” fussy eating were not associated with zBMI at 11 years. Interactions between class and sex in their effects on zBMI at 11 were not supported for any of the EBs. Results from unadjusted regression models are available in eTable 6a-c.

### TABLE 2 HERE

## 257 Discussion

258 In this study, differential developmental patterns in EBs across childhood were identified and  
 259 found to be associated with later child zBMI. This is the first study to address this question,  
 260 by establishing longitudinal trajectories of EBs during the first ten years of childhood and  
 261 investigating their association with childhood zBMI at age 11. Results suggested four  
 262 different trajectories of overeating and six trajectories each for undereating and fussy eating,  
 263 respectively.

264 The majority of children were not described as overeaters by their parents. However, two  
 265 trajectories (16% of children) were marked by gradual increases in overeating and showed  
 266 similar positive associations with child zBMI at age 11. The tendency to overeat is likely to  
 267 result in larger portion sizes, which have been suggested to have enduring effects on child  
 268 weight (29, 30). Recent longitudinal analyses of dietary data in a UK child cohort highlighted  
 269 that eating larger portions a few times per week accelerates early childhood growth (31).

270 In contrast to overeating, undereating was more common and more heterogeneous. By 15  
 271 months, parents reported that children engaged in various levels of undereating, with about  
 272 10% of boys and girls reported to undereat at a worrying level. However, undereating  
 273 behavior of most children attenuated with time, indicating that parent-perceived undereating  
 274 in children under the age of two years may represent a normal pattern of development. Only  
 275 2-3% of children engaged in persistent high levels of undereating. This persistent pattern of  
 276 undereating was negatively associated with child zBMI at age 11. Parental reports of  
 277 undereating might be an indication of satiety sensitivity (32). Previous research has suggested  
 278 that children who were attuned to their internal satiety cues ate smaller portions (33), and  
 279 grew at a slower rate than their less satiety-responsive siblings (34).

280 Similarly to undereating, fussy eating behavior was highly heterogeneous in early life. Using  
 281 LCGA, we identified, a small but substantial group of children (8%) who were persistently  
 282 fussy throughout the first ten years of life. These results add to previous studies suggesting  
 283 that some fussiness around food is common during childhood, with one third of children  
 284 reported to be fussy at some point, but only a small percentage of children remaining highly  
 285 fussy eaters across development (3). More persistent fussy eating trajectories were negatively  
 286 associated with child zBMI at age 11.

287 The relationship between food fussiness and weight is complex as fussy children might  
 288 undereat certain food groups (e.g., fruits and vegetables) but overeat others (e.g.,  
 289 carbohydrates and fats). Previous cross-sectional studies proposed that fussy children ate  
 290 fewer vegetables and less fish, but consumed more savory and sweet snack foods at 14  
 291 months <sup>(35)</sup>. However, a longitudinal study indicated that persistent fussy eating in childhood  
 292 was associated with higher prevalence of underweight in children aged six years (16).

293 This study supports the prospective association between EBs and weight in children.  
 294 Individual differences in weight have consistently been shown to be influenced by genetic  
 295 factors (36). The behavioral susceptibility to obesity theory (37) suggests that EBs might act  
 296 as a mediator between genetic risk for obesity and exposure to the current obesogenic  
 297 environment. Previous studies proposed that increased genetic risk for obesity is associated  
 298 with decreased responsiveness to satiety cues, as well as greater responsiveness to external  
 299 food cues in ten year old twins (38). Subsequent research has replicated these findings in  
 300 Finnish (39), UK (40) and Canadian adults (41). However, previous studies only included  
 301 single measures of EBs and it remains unknown how genetic risk for obesity influences  
 302 longitudinal trajectories of EBs across development.

Apart from weight, EBs have been implicated in diet quality and as potential risk factor for eating disorders. Especially, food fussiness has been associated with poor diet quality,(42) such as low consumption of vegetables (43). Food fussiness has received attention in the context of avoidant/restrictive food intake disorder (ARFID) (44). ARFID is a recently defined diagnosis and little is known about its onset, development, and effect on health and is characterized by extreme food fussiness affecting growth, weight, and physical health (45) and that a large proportion of adolescents diagnosed with ARFID were persistent fussy eaters during childhood (46). More research examining the impact of early food fussiness and undereating on feeding and eating disorders risk is needed. It is possible that the persistent fussy and undereating associated with low zBMI in this study may be ARFID presentations, or risk factors for other eating disorders marked by restrictive eating, such as anorexia nervosa. Further, child food fussiness has been found to be moderately heritable (47) and future research is needed to uncover its genetic basis, as well as the role of fussy eating in neurodevelopmental disorders such as autism spectrum disorder.

### **Strengths and Limitations**

To our knowledge, this is the most comprehensive longitudinal study of child EBs in a large sample. Data were from a population-based cohort and person-centered statistical analyses allowed us to clarify the heterogeneity of EBs. Height and weight were objectively measured during clinic visits. However, measures of EBs were parent reported and subject to reporting bias. For example parents might be influenced by their own eating behaviors, their prior experiences with other children and might be observing their children more closely in early life. As children grow up and enter school, they will have an increasing numbers of meals outside the family home. Therefore parents might be less aware of their children's EBs. However, relying on parental report remains the most commonly used measure of child EBs, given that young children are not able to report their own behavior reliably, and standardized

direct observational measures are costly and time-consuming, and would be infeasible for large cohorts such as ALSPAC. Additional support for the use of parental reports comes from research validating parent-reported child eating against behavioral measures of eating such as eating rate, energy intake at meal, eating without hunger and caloric compensation (32). Additionally, analyzing the effect of estimated class membership on an outcome includes some degree of uncertainty. Classes derived from LCGA are unobserved and hence class membership is inferred. We used maximum-probability assignment, which allocates each participant to the class they are most likely to belong to, carrying this class membership forward to further analyses. This method has been suggested to attenuate the effect of class on distal outcomes, due to uncertainty in class assignment (48). Hence, effect sizes estimated from the regression analyses may be conservative.

## Conclusions

We identified four trajectories of overeating and six trajectories each of fussy and undereating in the ALSPAC sample, providing a thorough examination of child EBs. EB trajectories were differentially associated with child zBMI, with persistent behaviors having a stronger effect on BMI. Characterizing the heterogeneity of early life EBs is an important component to understanding behavioral risk factors for common conditions, such as obesity.

## Acknowledgements:

We are extremely grateful to all the families who took part in this study, the midwives for their help in recruiting them, and the whole ALSPAC team, which includes interviewers, computer and laboratory technicians, clerical workers, research scientists, volunteers, managers, receptionists and nurses.

## Funder:

This work was supported by the UK Medical Research Council and the Medical Research Foundation (ref: MR/R004803/1).

The UK Medical Research Council and Wellcome (Grant ref: 102215/2/13/2) and the University of Bristol provide core support for ALSPAC. A comprehensive list of grants funding is available on the ALSPAC website (<http://www.bristol.ac.uk/alspac/external/documents/grant-acknowledgements.pdf>).

Prof Bulik acknowledges funding from the Swedish Research Council (VR Dnr: 538-2013-8864).

The funders were not involved in the design or conduct of the study; collection, management, analysis, or interpretation of the data; or preparation, review, or approval of the manuscript.

**Potential conflict of interest:** Bulik reports: Shire (grant recipient, Scientific Advisory Board member) and Pearson and Walker (author, royalty recipient). All other authors have indicated they have no conflicts of interest to disclose.

#### **Author Contributions:**

MH, BDS, CB, RBW and NM designed the research; MH and BDS performed statistical analyses; all authors wrote and revised the manuscript for important intellectual content; NM had primary responsibility for final content. All authors read and approved the final manuscript.



## References

1. Ashcroft J, Semmler C, Carnell S, van Jaarsveld CHM, Wardle J. Continuity and stability of eating behaviour traits in children. *Eur J Clin Nutr*. 2008;62(8):985-90.
2. Emmett PM, Hays NP, Taylor CM. Factors Associated with Maternal Worry about Her Young Child Exhibiting Choosy Feeding Behaviour. *Int J Env Res Pub He*. 2018;15(6).
3. Cardona Cano S, Tiemeier H, Van Hoeken D, Tharner A, Jaddoe VW, Hofman A, et al. Trajectories of picky eating during childhood: A general population study. *The International journal of eating disorders*. 2015;48(6):570-9.
4. Braet C, Claus L, Goossens L, Moens E, Van Vlierberghe L, Soetens B. Differences in eating style between overweight and normal-weight youngsters. *J Health Psychol*. 2008;13(6):733-43.
5. Domoff SE, Miller AL, Kaciroti N, Lumeng JC. Validation of the Children's Eating Behaviour Questionnaire in a low-income preschool-aged sample in the United States. *Appetite*. 2015;95:415-20.
6. Hajna S, LeBlanc PJ, Faight BE, Merchant AT, Cairney J, Hay J, et al. Associations between family eating behaviours and body composition measures in peri-adolescents: Results from a community-based study of school-aged children. *Can J Public Health*. 2014;105(1):E15-E21.
7. Jansen PW, Roza SJ, Jaddoe VW, Mackenbach JD, Raat H, Hofman A, et al. Children's eating behavior, feeding practices of parents and weight problems in early childhood: results from the population-based Generation R Study. *The international journal of behavioral nutrition and physical activity*. 2012;9:130.
8. Webber L, Hill C, Saxton J, Van Jaarsveld CH, Wardle J. Eating behaviour and weight in children. *International journal of obesity*. 2009;33(1):21-8.
9. Sanchez U, Weisstaub G, Santos JL, Corvalan C, Uauy R. GOCS cohort: children's eating behavior scores and BMI. *Eur J Clin Nutr*. 2016.
10. Svensson V, Lundborg L, Cao Y, Nowicka P, Marcus C, Sobko T. Obesity related eating behaviour patterns in Swedish preschool children and association with age, gender, relative weight and parental weight--factorial validation of the Children's Eating Behaviour Questionnaire. *The international journal of behavioral nutrition and physical activity*. 2011;8:134.
11. Cao YT, Svensson V, Marcus C, Zhang J, Zhang JD, Sobko T. Eating behaviour patterns in Chinese children aged 12-18 months and association with relative weight--factorial validation of the Children's Eating Behaviour Questionnaire. *The international journal of behavioral nutrition and physical activity*. 2012;9:5.
12. Parkinson KN, Drewett RF, Le Couteur AS, Adamson AJ, T GMS. Do maternal ratings of appetite in infants predict later Child Eating Behaviour Questionnaire scores and body mass index? *Appetite*. 2010;54(1):186-90.
13. van Jaarsveld CHM, Llewellyn CH, Johnson L, Wardle J. Prospective associations between appetitive traits and weight gain in infancy. *Am J Clin Nutr*. 2011;94(6):1562-7.
14. Steinsbekk S, Wichstrom L. Predictors of Change in BMI From the Age of 4 to 8. *Journal of pediatric psychology*. 2015.
15. Antoniou EE, Roefs A, Kremers SP, Jansen A, Gubbels JS, Sleddens EF, et al. Picky eating and child weight status development: a longitudinal study. *J Hum Nutr Diet*. 2016;29(3):298-307.
16. de Barse LM, Tiemeier H, Leermakers ET, Voortman T, Jaddoe VW, Edelson LR, et al. Longitudinal association between preschool fussy eating and body composition at 6 years of age:

419 The Generation R Study. The international journal of behavioral nutrition and physical activity.  
420 2015;12:153.

421 17. Mallan KM, Fildes A, Magarey AM, Daniels LA. The Relationship between Number of Fruits,  
422 Vegetables, and Noncore Foods Tried at Age 14 Months and Food Preferences, Dietary Intake  
423 Patterns, Fussy Eating Behavior, and Weight Status at Age 3.7 Years. J Acad Nutr Diet.  
424 2016;116(4):630-7.

425 18. Carruth BR, Skinner JD. Revisiting the picky eater phenomenon: neophobic behaviors of  
426 young children. J Am Coll Nutr. 2000;19(6):771-80.

427 19. Taylor CM, Steer CD, Hays NP, Emmett PM. Growth and body composition in children who  
428 are picky eaters: a longitudinal view. Eur J Clin Nutr. 2018.

429 20. Boyd A, Golding J, Macleod J, Lawlor DA, Fraser A, Henderson J, et al. Cohort Profile: the  
430 'children of the 90s'--the index offspring of the Avon Longitudinal Study of Parents and Children. Int J  
431 Epidemiol. 2013;42(1):111-27.

432 21. Fraser A, Macdonald-Wallis C, Tilling K, Boyd A, Golding J, Smith GD, et al. Cohort Profile: The  
433 Avon Longitudinal Study of Parents and Children: ALSPAC mothers cohort. International Journal of  
434 Epidemiology. 2013;42(1):97-110.

435 22. Cole TJ, Bellizzi MC, Flegal KM, Dietz WH. Establishing a standard definition for child  
436 overweight and obesity worldwide: international survey. BMJ. 2000;320(7244):1240-3.

437 23. Clogg C. Latent class models: Recent developments and prospects for the future. In:  
438 Arminger G, Clogg C, Sobel M, editors. Handbook of statistical modeling for the social and behavioral  
439 sciences. New York, NY: Plenum Press;; 1995. p. 311 - 59.

440 24. Berlin KS, Parra GR, Williams NA. An Introduction to Latent Variable Mixture Modeling (Part  
441 2): Longitudinal Latent Class Growth Analysis and Growth Mixture Models. Journal of pediatric  
442 psychology. 2014;39(2):188-203.

443 25. Asparouhov T, Muthen B. Auxiliary Variables in Mixture Modeling: Three-Step Approaches  
444 Using Mplus. Struct Equ Modeling. 2014;21(3):329-41.

445 26. Goodman LA. On the Assignment of Individuals to Latent Classes. Sociol Methodol.  
446 2007;37:1-22.

447 27. Muthen LK, Muthen B. Mplus User's Guide. Eighth Edition. Los Angeles, CA Muthén &  
448 Muthén; 1997-2017

449 28. StataCorp. Stata Statistical Software: Release 15. College Station, TX: StataCorp LLC 2017.

450 29. Huang TT, Howarth NC, Lin BH, Roberts SB, McCrory MA. Energy intake and meal portions:  
451 associations with BMI percentile in U.S. children. Obes Res. 2004;12(11):1875-85.

452 30. McConahy KL, Smicklas-Wright H, Birch LL, Mitchell DC, Picciano MF. Food portions are  
453 positively related to energy intake and body weight in early childhood. J Pediatr-U.S.  
454 2002;140(3):340-7.

455 31. Syrad H, Llewellyn CH, Johnson L, Boniface D, Jebb SA, van Jaarsveld CHM, et al. Meal size is  
456 a critical driver of weight gain in early childhood. Sci Rep-Uk. 2016;6.

457 32. Carnell S, Wardle J. Measuring behavioural susceptibility to obesity: validation of the child  
458 eating behaviour questionnaire. Appetite. 2007;48(1):104-13.

459 33. Syrad H, Johnson L, Wardle J, Llewellyn CH. Appetitive traits and food intake patterns in early  
460 life. Am J Clin Nutr. 2016;103(1):231-5.

461 34. van Jaarsveld CHM, Boniface D, Llewellyn CH, Wardle J. Appetite and Growth A Longitudinal  
462 Sibling Analysis. Jama Pediatr. 2014;168(4):345-50.

463 35. Tharner A, Jansen PW, Kiefte-de Jong JC, Moll HA, van der Ende J, Jaddoe VW, et al. Toward  
464 an operative diagnosis of fussy/picky eating: a latent profile approach in a population-based cohort.  
465 The international journal of behavioral nutrition and physical activity. 2014;11:14.

466 36. Locke AE, Kahali B, Berndt SI, Justice AE, Pers TH, Felix R, et al. Genetic studies of body mass  
467 index yield new insights for obesity biology. Nature. 2015;518(7538):197-U401.

468 37. Llewellyn C, Wardle J. Behavioral susceptibility to obesity: Gene-environment interplay in  
469 the development of weight. Physiology & behavior. 2015;152(Pt B):494-501.

38. Llewellyn CH, Trzaskowski M, van Jaarsveld CHM, Plomin R, Wardle J. Satiety mechanisms in genetic risk of obesity. *Jama Pediatr.* 2014;168(4):338-44.
39. Konttinen H, Llewellyn C, Wardle J, Silventoinen K, Joensuu A, Mannisto S, et al. Appetitive traits as behavioural pathways in genetic susceptibility to obesity: a population-based cross-sectional study. *Sci Rep-Uk.* 2015;5.
40. de Lauzon-Guillain B, Clifton EA, Day FR, Clement K, Brage S, Forouhi NG, et al. Mediation and modification of genetic susceptibility to obesity by eating behaviors. *Am J Clin Nutr.* 2017;106(4):996-1004.
41. Jacob R, Drapeau V, Tremblay A, Provencher V, Bouchard C, Perusse L. The role of eating behavior traits in mediating genetic susceptibility to obesity. *Am J Clin Nutr.* 2018;108(3):445-52.
42. Vilela S, Hetherington MM, Oliveira A, Lopes C. Tracking diet variety in childhood and its association with eating behaviours related to appetite: The generation XXI birth cohort. *Appetite.* 2018;123:241-8.
43. de Barse LM, Tiemeier H, Leermakers ETM, Voortman T, Jaddoe VWV, Edelson LR, et al. Longitudinal association between preschool fussy eating and body composition at 6 years of age: The Generation R Study. *The international journal of behavioral nutrition and physical activity.* 2015;12(153):8.
44. APA APA. *Diagnostic and Statistical Manual of Mental Disorders (DSM-V)*. Arlington, VA: APA Press; 2013.
45. Bryant-Waugh R. *Avoidant restrictive food intake disorder: An illustrative case example*. New York, N.Y.: Wiley; 2013. 1 online resource p.
46. Fisher MM, Rosen DS, Ornstein RM, Mammel KA, Katzman DK, Rome ES, et al. Characteristics of avoidant/restrictive food intake disorder in children and adolescents: a "new disorder" in DSM-5. *J Adolesc Health.* 2014;55(1):49-52.
47. Smith AD, Herle M, Fildes A, Cooke L, Steinsbekk S, Llewellyn CH. Food fussiness and food neophobia share a common etiology in early childhood. *J Child Psychol Psyc.* 2017;58(2):189-96.
48. Bray BC, Lanza ST, Tan X. Eliminating Bias in Classify-Analyze Approaches for Latent Class Analysis. *Struct Equ Modeling.* 2015;22(1):1-11.

512 **Tables**

513

**Table 1: Summary statistics of the baseline characteristics of the study population;  
ALSPAC Study**

| <b>Baseline characteristics</b>                                       |                    |                           |
|-----------------------------------------------------------------------|--------------------|---------------------------|
|                                                                       | <b>N available</b> | <b>Mean (SD) or N (%)</b> |
| <b>Sex</b>                                                            | 12048              | Boys: 6208 (52)           |
| <b>Gestational age at birth (weeks)</b>                               | 12048              | 39.45 (1.86)              |
| <b>Birthweight (grams)</b>                                            | 11902              | 345 (546)                 |
| <b>Maternal age (years)</b>                                           | 12048              | 28.31 (4.86)              |
| <b>Maternal A-Levels or higher</b>                                    | 11375              | 4158 (37)                 |
| <b>Parental non-manual labor<br/>profession</b>                       | 9366               | 7558 (81)                 |
| <b>zBMI <sup>a</sup> of children at age 11<br/>(kg/m<sup>2</sup>)</b> | 4885               | 0.60 (1.14)               |

514

515

516

517

518

519

520

521

522

523

524

525

526

527

528

529

530

| Overeating                                                                                    |                                |                     |       |         |        |       |  |
|-----------------------------------------------------------------------------------------------|--------------------------------|---------------------|-------|---------|--------|-------|--|
| Outcome: age and sex adjusted BMI aged 11 <sup>1</sup> , adjusted for covariates <sup>2</sup> |                                |                     |       |         |        |       |  |
|                                                                                               | Boys                           |                     |       | Girls   |        |       |  |
| N                                                                                             | 2286                           |                     |       | 2596    |        |       |  |
| Class                                                                                         | $\beta$                        | 95% CI <sup>3</sup> |       | $\beta$ | 95% CI |       |  |
| 1 low stable                                                                                  | base                           |                     |       | Base    |        |       |  |
| 2 low transient                                                                               | 0.26                           | 0.13                | 0.39  | 0.32    | 0.19   | 0.44  |  |
| 3 late increasing                                                                             | 0.94                           | 0.8                 | 1.09  | 0.94    | 0.82   | 1.07  |  |
| 4 early increasing                                                                            | 0.83                           | 0.65                | 1.02  | 1.1     | 0.92   | 1.28  |  |
| Test for (Sex * Class) interaction                                                            | F (3, 4869) = 1.10, $p=0.35$   |                     |       |         |        |       |  |
| Undereating                                                                                   |                                |                     |       |         |        |       |  |
| Outcome: age and sex adjusted BMI aged 11, adjusted for covariates <sup>2</sup>               |                                |                     |       |         |        |       |  |
|                                                                                               | Boys                           |                     |       | Girls   |        |       |  |
| N                                                                                             | 2285                           |                     |       | 2595    |        |       |  |
| Class                                                                                         | $\beta$                        | 95% CI              |       | $\beta$ | 95% CI |       |  |
| 1 low stable                                                                                  | base                           |                     |       | base    |        |       |  |
| 2 low transient                                                                               | -0.11                          | -0.24               | 0.01  | -0.13   | -0.24  | -0.01 |  |
| 3 low decreasing                                                                              | -0.17                          | -0.31               | -0.03 | -0.19   | -0.32  | -0.07 |  |
| 4 high transient                                                                              | -0.25                          | -0.41               | -0.08 | -0.24   | -0.38  | -0.09 |  |
| 5 high decreasing                                                                             | -0.27                          | -0.5                | -0.05 | -0.21   | -0.45  | 0.03  |  |
| 6 high stable                                                                                 | -0.79                          | -1.15               | -0.42 | -0.76   | -1.06  | -0.45 |  |
| Test for (Sex * Class) interaction                                                            | F (5, 4863) = 0.12, $p = 0.98$ |                     |       |         |        |       |  |
| Fussy Eating                                                                                  |                                |                     |       |         |        |       |  |
| Outcome: age and sex adjusted BMI aged 11, adjusted for covariates <sup>2</sup>               |                                |                     |       |         |        |       |  |
|                                                                                               | Boys                           |                     |       | Girls   |        |       |  |
| N                                                                                             | 2287                           |                     |       | 2597    |        |       |  |
| Class                                                                                         | $\beta$                        | 95% CI              |       | $\beta$ | 95% CI |       |  |
| 1 low stable                                                                                  | base                           |                     |       | base    |        |       |  |
| 2 low transient                                                                               | -0.21                          | -0.36               | -0.05 | 0.01    | -0.13  | 0.15  |  |
| 3 low increasing                                                                              | -0.25                          | -0.39               | -0.11 | -0.01   | -0.13  | 0.11  |  |
| 4 high decreasing                                                                             | -0.31                          | -0.48               | -0.15 | -0.31   | -0.45  | -0.17 |  |
| 5 low increasing                                                                              | -0.34                          | -0.50               | -0.17 | -0.26   | -0.41  | -0.11 |  |
| 6 high stable                                                                                 | -0.49                          | -0.68               | -0.30 | -0.35   | -0.52  | -0.18 |  |
| Test for (Sex * Class) interaction                                                            | F (5, 4867) = 2.01, $p = 0.07$ |                     |       |         |        |       |  |

<sup>1</sup> Age and sex standardized score in reference to the UK population (22)

<sup>2</sup> Estimates adjusted for: maternal age at birth, gestational age, birthweight and maternal

education <sup>3</sup> CI: Confidence Intervals

531

532

**Figure 1: Prevalence of eating behaviours across the eight assessment waves**

■ didn't happen ■ not worried ■ a bit/great worry

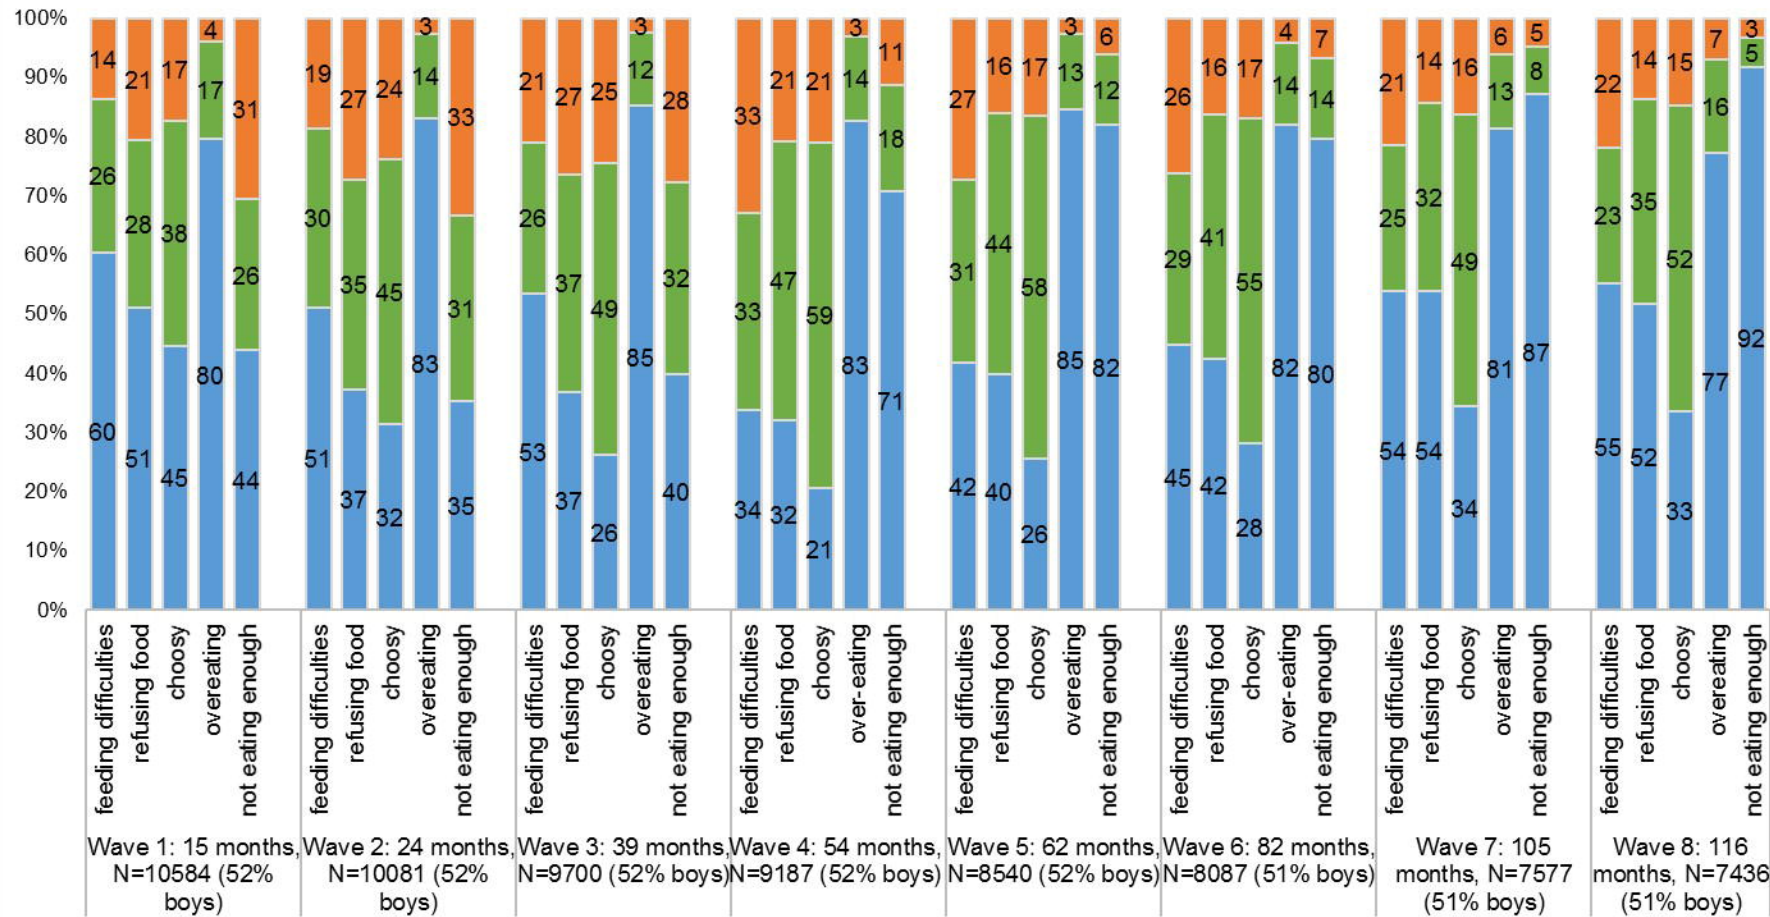

**Figure 2: Assigned classes of overeating, undereating and fussy eating using posterior probabilities**

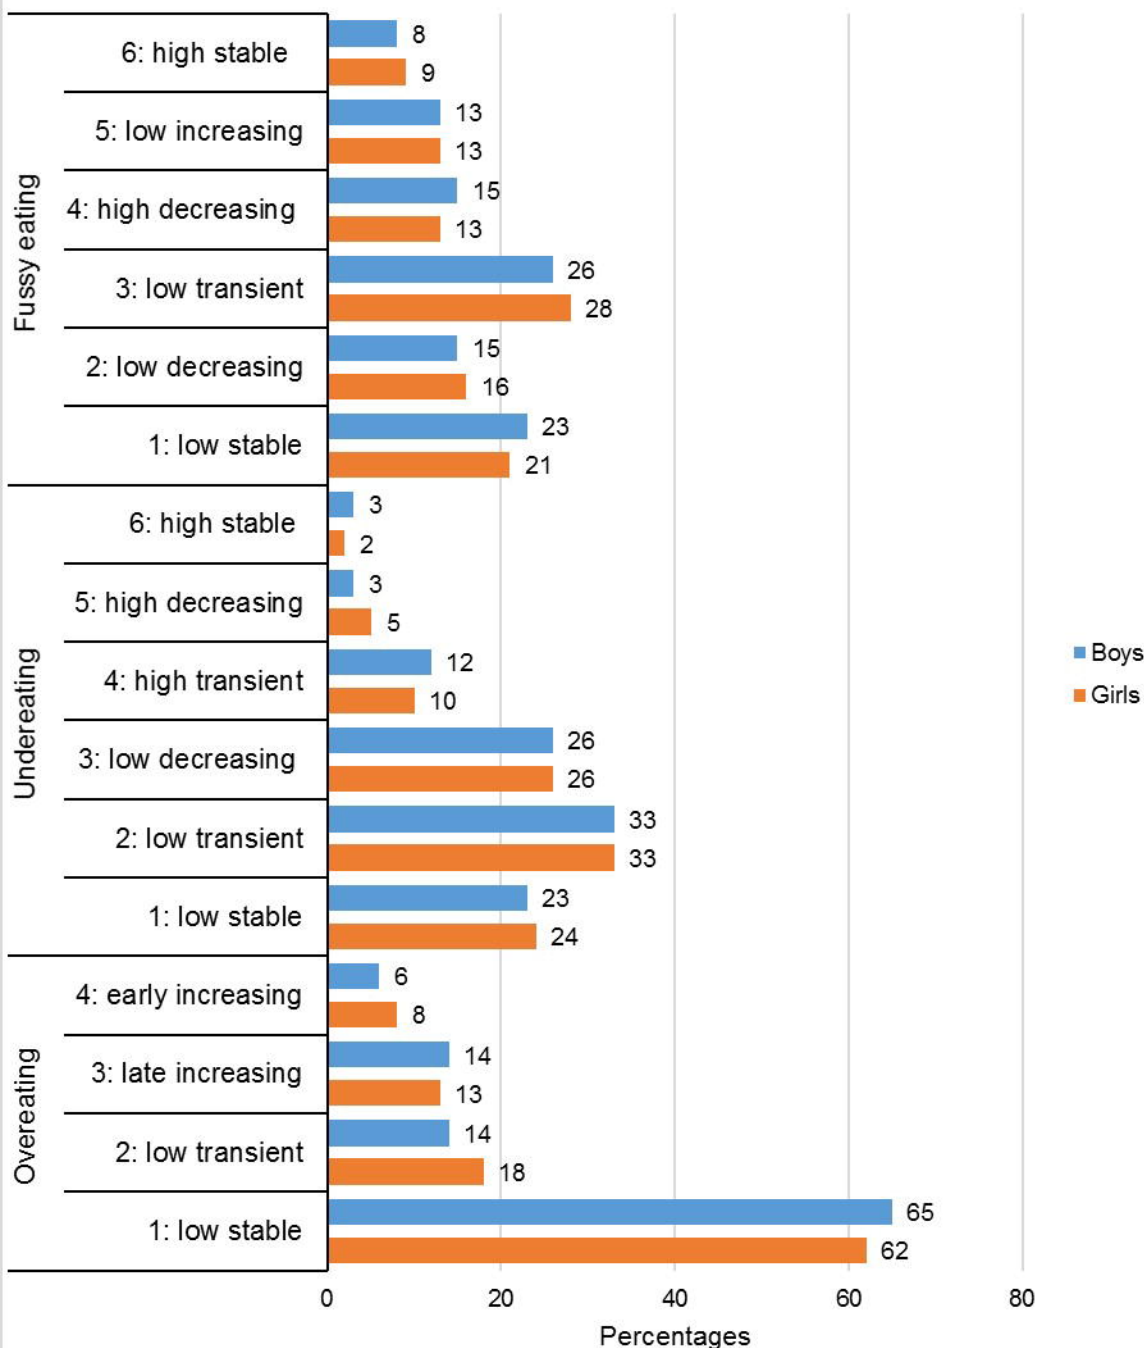



### Figure 3a: Trajectories of parental reports of overeating behaviors from 15 to 116 months for boys and girls (6186 boys, 5817 girls)

**Caption:** The y-axis shows the probability of scoring in the highest category of overeating (“great worry”) at each of the eight time points. Trajectories for boys are in dashed lines. Trajectories for girls are in solid lines. The legend shows the name of the class for boys (Bs) and girls (Gs), followed by their percentages in brackets.

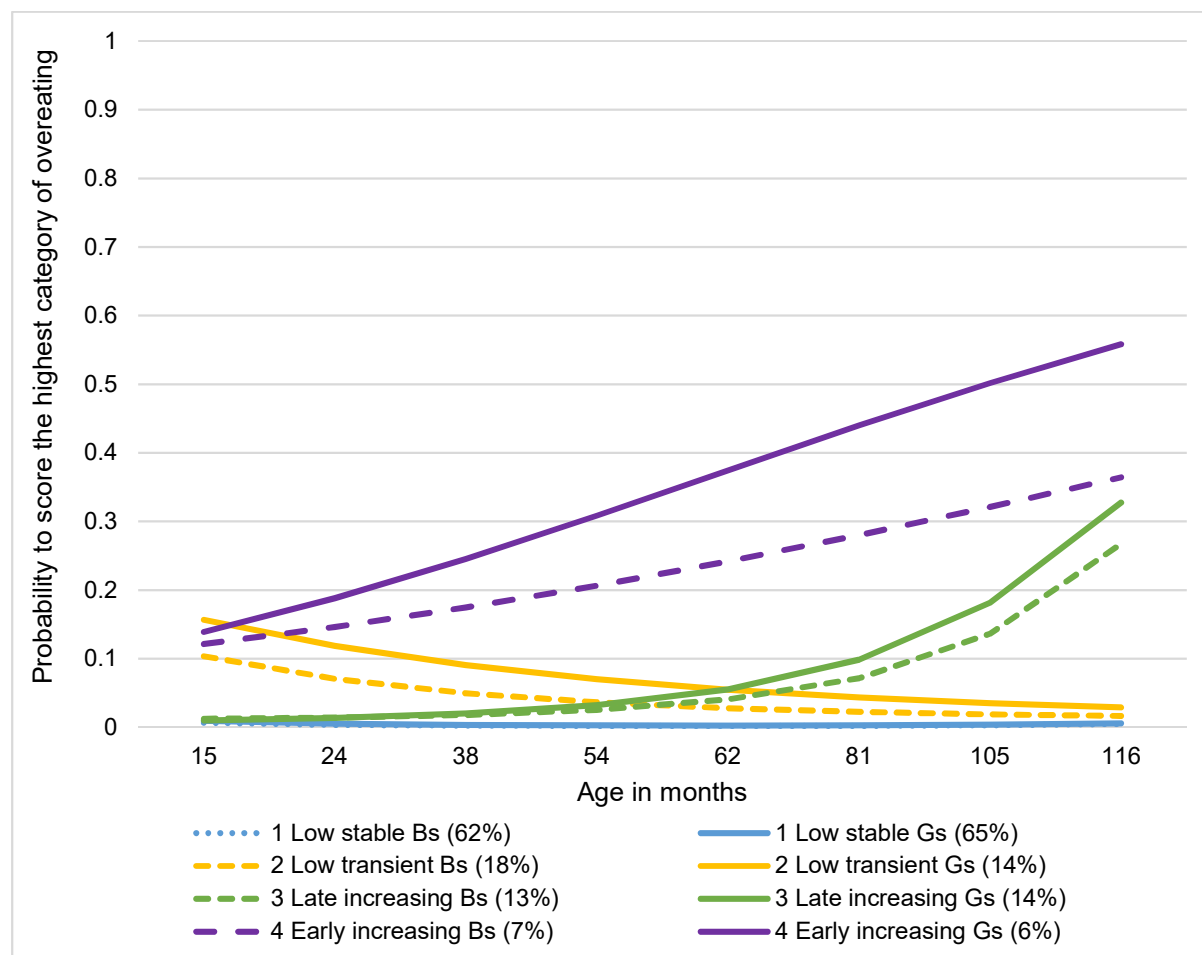

## Figures 3b: Trajectories of parental reports of undereating behaviors from 15 to 116 months for boys and girls (6189 boys, 5817 girls)

**Caption:** The y-axis shows the probability of scoring in the highest category of undereating (“a bit worried”) at each of the eight time points. Trajectories for boys are in dashed lines. Trajectories for girls are in solid lines. The legend shows the name of the class for boys (Bs) and girls (Gs), followed by their percentages in brackets.

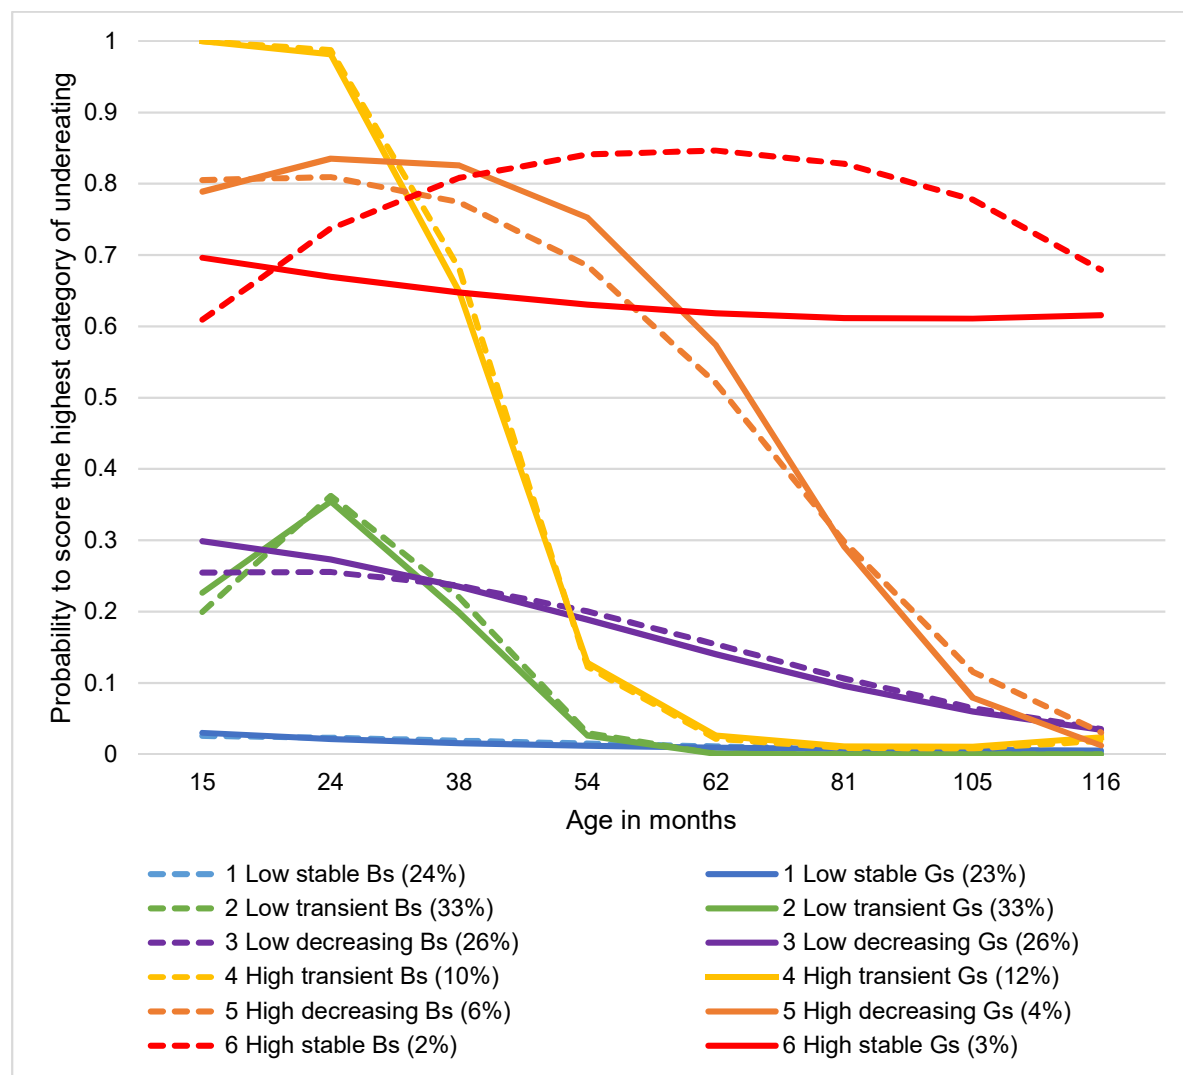

### Figures 3c: Trajectories of parental reports of fussy eating behaviors from 15 to 116 months for boys and girls (6208 boys, 5840 girls)

**Caption:** The y-axis shows the probability of scoring in the highest category of the fussy eating items ("a bit worried") at each of the eight time points. Trajectories for boys are in dashed lines. Trajectories for girls are in solid lines. The legend shows the name of the class for boys (Bs) and girls (Gs), followed by their percentages in brackets.

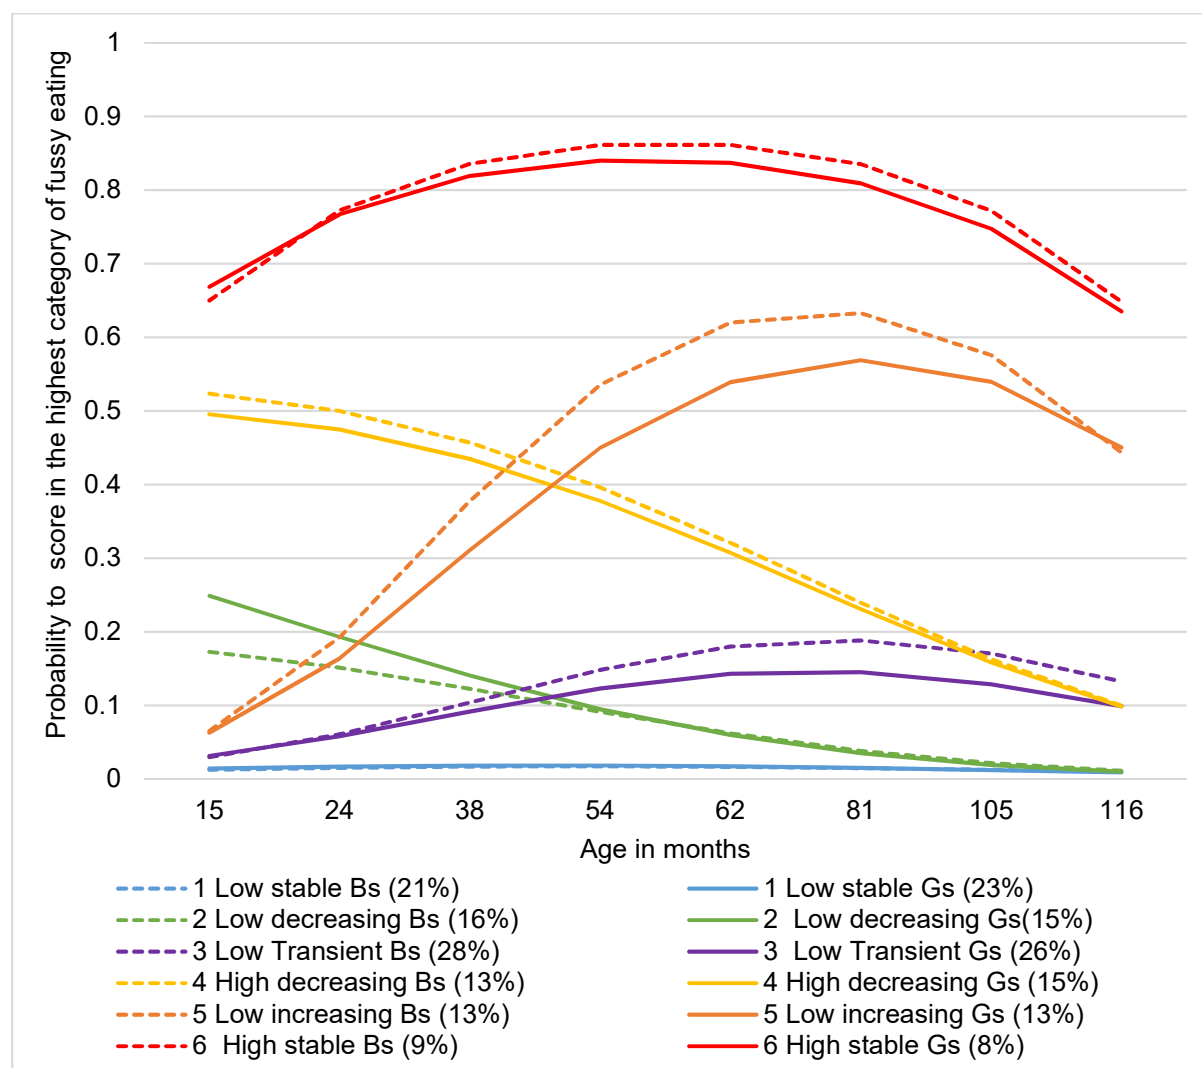

Source: https://medrxiv.org/content/medrxiv/early/2019/08/02/19003665.full.pdf
